# Supplementary material for: 3D high-energy-density and low sensitivity materials: synthesis, structure and physicochemical properties of an azide–Cu(ii) complex with 3,5-dinitrobenzoic acid
Source: Royal Society of Chemistry journal article supplement (doi:10.1039/c4ra00635f), 2014-01-01
Supplement: c4ra00635f1.pdf [file c4ra00635f1.pdf]

## SUPPORTING MATERIALS

### 3D High-Energy-Density Materials and Low Sensitivity: Synthesis, Structure and Physicochemical Property of An Azide- Cu(II) Complex with 3,5-Dinitrobenzoic Acid

Xiangyu Liu,<sup>a,b</sup> Qi Yang,<sup>a</sup> Zhiyong Su,<sup>a</sup> Sanping Chen,<sup>\*a</sup>

Gang Xie,<sup>a</sup> Qing Wei,<sup>a</sup> Shengli Gao<sup>a</sup>

[a] Key Laboratory of Synthetic and Natural Functional Molecule Chemistry of Ministry of Education, College of Chemistry and Materials Science, Northwest University, Xi'an 710069, China

[b] School of Chemistry and Chemical Engineering, Ningxia University, Yinchuan 750021, China

\*Corresponding author

Prof. Sanping Chen

Tel.: +86-029-88302604

Fax: +86-029-88302604

E-mail: sanpingchen@126.com

## Table of Contents

### 1. Apparatus and conditions of the calorimetric experiment.

References

**Fig. S1.** XRPD diagrams for the complex.

**Table S1** Selected bond lengths (Å) and bond angles (°).

### 1. Apparatus and conditions of the calorimetric experiment.

The constant-volume combustion energy of the complex was determined with a precise rotating-bomb calorimeter (RBC-type II). The main experimental procedures were described previously [1]. The correct value of the heat exchange was calculated according to the Linió-Pyfengdelel-Wsava equation [2].

The energy equivalent of the calorimeter was calibrated with benzoic acid, which has an isothermal heat of combustion of  $(-26434 \pm 3)$  J g<sup>-1</sup> at 298.15 K. The analytical methods of the final products (gas, liquid, and solid) were as reported in Ref [1]. The amount of nitric acid was determined by using Devarda's alloy method [3]. Because the crucible in the rotating bomb was attached to the support, the final solid products were left in the crucible at the end of the experiment. Analytical data of the final products indicate that the combustion reaction was complete.

The constant-volume combustion energy is calculated by Eq. (1) [4, 5].

$$\Delta_c U = \frac{W\Delta T - aG - 5.97b}{m} \quad (1)$$

where  $\Delta_c U$  (complex, s) denotes the constant-volume combustion energy of the complex ( in J g<sup>-1</sup>),  $W$  is the energy equivalent of the rotating-bomb calorimeter (in J K<sup>-1</sup>),  $a$  is the length of the actual Ni-Cr wire consumed (in cm).  $G$  is the combustion enthalpy of Ni-Cr wire for ignition (0.9 J cm<sup>-1</sup>), 5.97 J·cm<sup>-3</sup> is the formation enthalpy and solution enthalpy of nitric acid corresponding to 1 cm<sup>3</sup> of 0.1000 mol dm<sup>-3</sup> NaOH,  $b$  is the volume (in cm<sup>3</sup>) of consumed 0.1000 mol dm<sup>-3</sup> NaOH and  $\Delta T$  is the correct value of the temperature rise,  $m$  is the mass (in g) of the complex.

The constant-volume combustion energies of the complex were repeatedly measured for six times. Typical result is  $(-10971.11 \pm 6.56)$  J g<sup>-1</sup>. The relative atomic masses used in the calculation of all molar quantities were those recommended by the IUPAC Commission in 2005 [6].

## References

- [1] X.-W. Yang, S.-P. Chen, S.-L. Gao, H.-Y. Li, Q.-Z. Shi, Construction of a rotating-bomb combustion calorimeter and measurement of thermal effects, *Instrum. Sci. Technol.* 30 (2002) 311-321.
- [2] M. M. Popov, *Thermometry and Calorimetry*; Moscow University Publishing House: Moscow. (1954) 382.
- [3] A. I. Vogel, *Quantitative Inorganic Analysis*; Longman: London, 1978.
- [4] Q. Shuai, S.-P. Chen, X.-W. Yang, S.-L. Gao, Synthesis, crystal structure and thermochemical behaviour of a barium complex  $[\text{Ba}(5\text{-OH-BDC})(\text{H}_2\text{O})_3][5\text{-OH-H}_2\text{BDC} = 5\text{-hydroxyisophthalic acid}]$ , *Thermochim. Acta.* 447 (2006) 45-51.
- [5] F. Liu, L.-J. Wang, F.-S. Yu, L.-L. Zhang, Q. Wu, Y.-N. Shi, X.-W. Yang, Synthesis, Crystal Structure, and Thermochemical Properties of a Copper (II) Complex  $[\text{Cu}(\text{BTZ})(\text{DMF})\text{Cl}]_2$  [BTZ=2-(2-Hydroxyphenyl)benzothiazolate], *J. Chem. Eng. Data.* 55 (2010) 1342-1346.
- [6] M. E. Wieser, Atomic Weights of the Element 2005, *Pure Appl. Chem.* 78 (2006) 2051-2066.

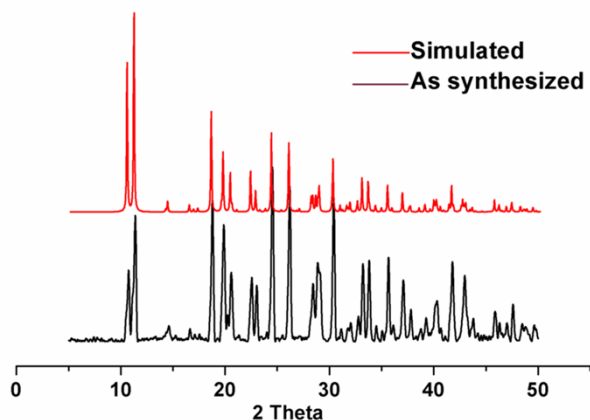

**Fig. S1.** XRPD diagrams for complex.

**Table S1** Selected bond lengths (Å) and bond angles (°).

|                     |          |
|---------------------|----------|
| Cu(1)-O(1)          | 1.939(4) |
| Cu(1)-N(1)          | 1.990(5) |
| N(2)-N(3)           | 1.239(8) |
| N(1)-Cu(1)#1        | 1.967(5) |
| Cu(1)-N(1)#2        | 1.967(6) |
| N(2)-N(1)           | 1.145(8) |
| Cu(1)-O(2)#2        | 1.950(4) |
| Cu(1)-O(4)          | 2.609(6) |
| O(4)-N(5)           | 1.197(8) |
| Cu(1)-Cu(1A)        | 3.387(2) |
| O(3)-N(5)           | 1.236(7) |
| O(1)-Cu(1)-O(2)#2   | 164.8(2) |
| C(1)-O(2)-Cu(1)#1   | 129.1(4) |
| O(1)-Cu(1)-N(1)     | 94.1(2)  |
| O(4)-N(5)-O(3)      | 123.9(6) |
| Cu(1)-N(1)-Cu(1A)#1 | 118.0(2) |
| N(3)-N(2)-N(1)      | 178.6(7) |
| O(6)-N(4)-O(5)      | 124.8(7) |
| N(2)-N(1)-Cu(1)#1   | 122.1(4) |
| O(1)-Cu(1)-N(1)#2   | 90.3(2)  |

Symmetry transformations used to generate equivalent atoms:

#1  $x+1/2, -y+3/2, -z+1$ ; #2  $x-1/2, -y+3/2, -z+1$
